# 1 Minimizing cumulative risk to control airborne transmission of 2 SARS-CoV2 in schools

3

4 Alessandro Zivelonghi<sup>1,2\*</sup>, Massimo Lai<sup>3</sup>

5

6 <sup>1</sup> Lecturer of Applied Mathematics, ITCS Lorgna-Pindemonte, Verona

7 <sup>2</sup> Power-Consulting Studio, San Pietro in Cariano, Verona

8 <sup>3</sup> Senior Research Scientist, Certara, UK

9

## 10 Abstract

11 School classrooms are enclosed settings where students and teachers spend prolonged periods of time and therefore  
12 risky environments for airborne transmission of SARS-CoV2. While countries worldwide have been pursuing different  
13 school reopening strategies, most EU countries are planning to keep schools open during the whole winter season  
14 2020/21. Open schools in winter in highly epidemic areas pose a controversial issue: ventilation of classrooms (an  
15 essential mitigation factor for airborne transmission) is expected to sensibly decrease due to outdoor temperatures  
16 getting colder. More specifically, personnel and students will comprehensibly request window closure to maintain  
17 thermal comfort and regulators are going to allow less restrictive policies on windows closure. Fundamental questions  
18 therefore arise which urge to be addressed: to which extent can we contain airborne risk in schools during the cold  
19 season while reducing air ventilation? What would be the best mitigation strategy considering also the risk for other  
20 seasonal diseases and the fact that most schools are not provided with mechanical ventilation systems? To try  
21 answering these questions the theoretical link between intervals of ventilation (natural or mechanical) and the lowering  
22 of aerosol contagion risk is explored based on a mathematical model. A safety risk-zone and a theoretical optimum  
23 are presented which are based solely on face mask wearing and optimization of air change intervals.

24 \*[alessandro.zivelonghi@itcspindemonte.edu.it](mailto:alessandro.zivelonghi@itcspindemonte.edu.it), [ing.zivelonghi@gmail.com](mailto:ing.zivelonghi@gmail.com)

25

## 26 Keywords:

- 27 • airborne transmission
- 28 • school classrooms
- 29 • natural ventilation
- 30 • SARS-Cov2
- 31 • GN-model
- 32 • optimization

33

34

## 35 Introduction

36 Currently, tense debates are raging on schools as possible contagion triggers of SARS-CoV-2  
37 (both direct and indirect). In the middle of the second pandemic wave, it is important to shed  
38 more light on this crucial matter for the issue of (re-)opening schools. That is, it is necessary  
39 to explore the link between airborne contagion risk and possible mitigation strategies, in  
40 particular by adopting natural ventilation cycles, which are the cheapest and most feasible NPI  
41 (non-pharmaceutical intervention). As stated in a study by Morawska (2020-2), "inhaling small  
42 airborne droplets is a probable third route of infection," in addition to transmission via larger  
43 respiratory droplets and direct contact with infected people or contaminated surfaces.  
44 According to past and recent publications (e.g., Leung [2020], Morawska [2020-1], and  
45 Escombe [2007]), oral transmission of infectious diseases in confined environments can be  
46 significantly reduced by proper ventilation. That is, particularly indirect oral transmission is  
47 believed to be effectively curbed through the frequent opening of windows or by mechanical  
48 HVAC systems (Morawska 2020-2). Although most of the relevant literature has focused on  
49 the spread of tuberculosis or influenza in hospitals, the general principle of dilution of viral  
50 load by means of natural ventilation is valid and pertinent for the SARS-CoV-2 virus in the  
51 context of schools. Notably, mechanical ventilation systems, when adequately configured, can  
52 be equally or even more effective (Morawska 2020-2, ASHRAE 2020). However, unlike  
53 hospitals, the vast majority of schools worldwide are not equipped with such systems and will  
54 not be, at least for the foreseeable future (including the 2020/2021 school year). Groups of  
55 students, which can potentially include tens of individuals, share the same premises for hours  
56 with potentially insufficient ventilation. This greatly increases the likelihood of coming into  
57 contact with virus-loaded aerosol droplets generated by even only one infected student or  
58 teacher in the same classroom. This issue is of concern even when social distancing is correctly  
59 implemented. Together, these facts suggest that SARS-CoV-2's indirect transmission with  
60 infective aerosol particles is a plausible scenario in all kind of schools where students are  
61 exposed to each other for hours in relatively small environments. On the other hand, frequent  
62 natural ventilation could help dilute the viral load by allowing fresh air from the outside to  
63 enter classrooms. The extent to which natural ventilation cycles may reduce the airborne  
64 contagion risk by decreasing the total viral load is the subject of the present study. Moreover,  
65 we show that the duration of lesson intervals (breaks) is one of the most critical parameters  
66 during winter, since only during breaks one can imagine the viral load be diluted by fully  
67 opening windows. Otherwise, during lessons the ambient temperature will drop dramatically  
68 and increase the risks of other diseases. Therefore, having windows open in classrooms must  
69 be carefully planned and controlled during the winter season. This motivates a  
70 theoretical/computational framework aiming to investigate and optimize the impact of air  
71 change cycles in classrooms on the aerosol contagion risk. The strategy illustrated in the  
72 present analysis is based on natural ventilation, which is simple, efficient, and virtually free to  
73 implement. The same modelling framework, however, can be employed with mechanical  
74 ventilation cycles (since what counts is ultimately the air exchange rate, not its source). This  
75 approach may therefore be useful also for the adoption of more sophisticated engineering  
76 solutions based on HVAC systems and/or be extended in combination with air cleaning  
77 systems. For a number of situations of the present time, however, it appears necessary to  
78 focus on an appropriate *natural* ventilation strategy, which may take an effective role in the  
79 mitigation of infections in schools.

80

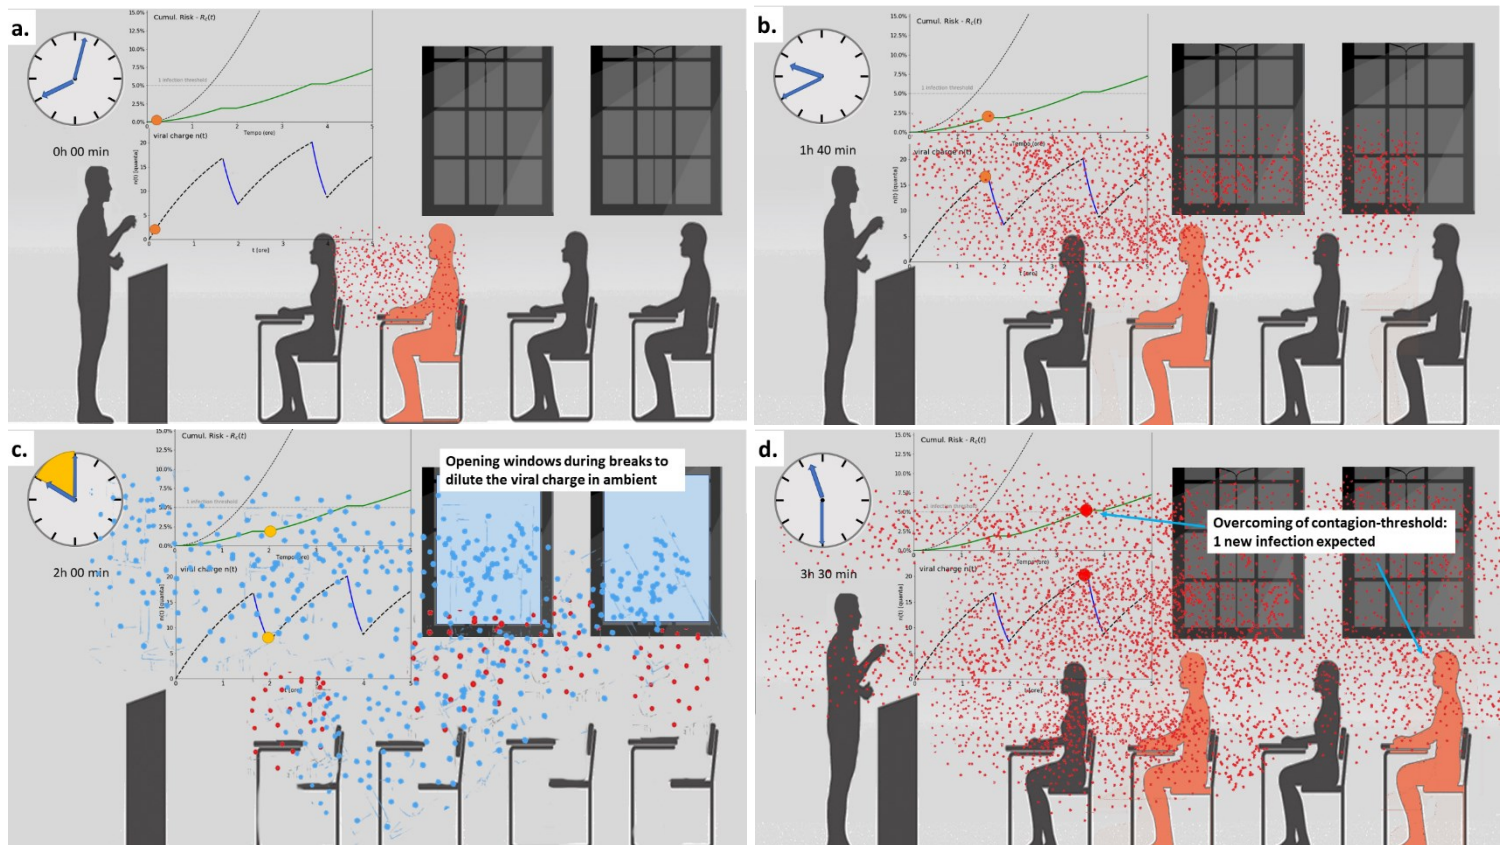

81

82 **Figure 1.** Evolution of viral charge and cumulative risk in a classroom with a positive subject for a time span of 3,5  
83 hours with one break of 20 min at the end of 100 min lesson. a) starting point b) end of first lecture ( $t=100\text{min}$ ) c) end  
84 of first break ( $t=120\text{min}$ ) and air change/dilution through windows opening d) end of second lecture with a new probable  
85 infected person. All presents are supposed to wear face masks half of the time.

86

87

88

89

90

91

92

93

94

95

96 *Extended GN-model*

97 The infection risk model used in the present analysis is essentially based on the Gammaitoni-  
 98 Nucci (GN) model, which is adequate for confined, ventilated environments [Gammaitoni 1997].  
 99 This model is based on the assumption that newly-produced viral particles are instantly diluted  
 100 over the whole environment volume (perfect-mixing) and that the emission rate parameter  $ER_q$   
 101 (number of viral particles generated per hour by each infectious subject) is known. A recent  
 102 paper, authored by several experts in the field [Morawska 2020], elucidated how a possible  
 103 mechanism for transmission of SARS-Covid2 in confined spaces would be the formation of “light”  
 104 aerosol droplets (i.e.  $< 5 \mu\text{m}$  in diameter, unlike “heavy” droplets, over  $5 \mu\text{m}$ ) that diffuse in the  
 105 environment after being produced by an infected person, therefore justifying the assumption of  
 106 an emission rate and a saturation in closed environments.

107 Classical non-threshold models, such as this, assume that the probability of infection is given by  
 108 the ratio between infectious subjects (C) and exposed subjects (S), therefore the probability of  
 109 infection is not proportional to number of exposed subjects. The rationale for this approximation  
 110 can be traced back to the hypothesis of perfect mixing and the fact that the model explicitly  
 111 represents only “indirect” transmission (i.e. via aerosol droplets), while omitting “direct”  
 112 transmission (i.e. by sneezing or by two subjects A and B breathing in close proximity). In the  
 113 GN model, if the number of viral sources (i.e. infectious subjects) remains constant, the  
 114 probability of infection for each subject at a given time  $t$  will only depend on the total  
 115 concentration of viral particles in the volume  $V$ , where it is supposed isotropically distributed.  
 116 This probability follows an exponential law for increasing exposure time  $t$ , and obviously depends  
 117 on the parameter  $ER_q$  and the ventilation ratio  $p/Q$ , where  $p$  is the average inhalation flow  
 118 (related to pulmonary capacity) and  $Q$  is the inflow of clean air provided by natural or mechanical  
 119 ventilation. The risk factor  $R$ , in the original RMR model (by Riley, Murphy and Riley) can be  
 120 written as:

121 
$$R^{RMR}(t) = \frac{C(t)}{S_0} = 1 - e^{\left[-\frac{ER_q p t}{Q}\right]} = 1 - e^{\left[-\frac{ER_q p t}{NV}\right]} \quad (1)$$

122 In the dynamical GN model, Eq. 1 can be improved by considering the variation of the number of  
 123 viral particles over time. According to the GN model, the risk of infection in a volume  $V$ , where one  
 124 infective subject is present and the initial number of viral particles is  $n_0$  (which can be different  
 125 from zero) is given by the general formula for the solution of this class of differential equations  
 126 (which we omit for brevity):

127 
$$R^{GN}(t) = 1 - e^{\left[-\frac{p ER_q}{V} \frac{Nt + e^{-Nt} - 1 - \left(\frac{Nn_0}{ER_q}\right)e^{-Nt} + \left(\frac{Nn_0}{ER_q}\right)}{N^2}\right]} = 1 - e^{\left[-\frac{p ER_q}{V} \varphi(t, n_0)\right]} \quad (2)$$

130 Where  $\varphi = Nt + e^{-Nt} - 1 - \left(\frac{Nn_0}{ER_q}\right)e^{-Nt} + \left(\frac{Nn_0}{ER_q}\right)$  and the ventilation rate  $N$  is also a function of time  
 131  $N(t)$  varying according to the profiles in Fig. 2. In Eq. (2),  $N$  represents the number of air renewal  
 132 events per hour (supposed constant during one lesson or one break), and is related to the air  
 133 renewal flow by the relation  $N = Q/V$  (not to be confused with the parameter  $n$ , lowercase, which  
 134 in the present work represents the total number of viral particles in the environment volume. In

135 other articles on the same subject, the notation may vary). The risk of infection  $R$  is affected by  
136 the ventilation ratio  $p/Q = p/NV$ .

137 In Eq. (1) and Eq. (2) another underlying assumption is that the initial risk is zero at time equal  
138 zero, i.e.  $R_{lec}(0) = 0$ . This is equivalent to assume (intuitively) that independently of the number  
139 of viral particles in the volume  $V$ , zero time of exposure entails zero risk.

140 To account for the effect of PPE (personal protective equipment, in this case, face masks) in  
141 reducing both the number of viral particles generated by infectious subjects, and also reducing the  
142 likelihood of inhalation of viral particles by exposed subjects, we propose a modification to Eq (2)  
143 whereby the viral inhalation term  $ER_q p/Q$  is multiplied by two scaling factors:

144  $(1 - f_{out})$ , which represents the fractional reduction of the generated viral load, and

145  $(1 - f_{in})$ , which represents the fractional reduction of inhaled viral load,

146 under the assumption that all subjects are wearing a mask. Eq. (2) can then be rewritten as:

147 
$$R^{mask}(t) = 1 - e^{-(1-f_{out})(1-f_{in}) \frac{p ER_q}{V} \varphi(t)} \quad (3)$$

148 If masks are not being worn,  $f_{in}$  and  $f_{out}$  are both zero.

149 The extent of efficacy of face masks in reducing airborne transmission is the subject of still ongoing  
150 debate, although a general wide agreement on their importance as mitigation factor has been  
151 accepted. Some recent results [Leung 2020] strongly supported the effectiveness of face masks  
152 in reducing the spread of infected aerosol droplets during exhalation, under the condition that the  
153 mask is correctly and permanently worn by both the infected and the susceptible subjects. The  
154 estimated efficacy of surgical masks in filtering the airborne viral load upon inhalation, represented  
155 by  $f_{in}$ , varies in the available literature. Some authors (e.g. [Smereka 2020]) estimate the value  
156 to be close to zero, claiming that masks can only filter "large" droplets ( $>5\mu\text{m}$ ), but more recent  
157 measurements suggest that surgical masks may actually be able to filter even "small", i.e. sub-  
158 micrometric, droplets [Mueller 2020]. In the present analysis, we considered a possible range of  
159 values 0 - 0.3 for  $f_{in}$  which is in line for surgical masks. As for the efficacy in filtering the exhaled  
160 viral load, the parameter  $f$  could have a value as high as 0.95 [Leung 2020], in the case of a  
161 perfectly-adhering surgical mask worn the whole time. In a classroom environment, however, it  
162 will be difficult to ensure complete and continuous compliance over the many hours of a typical  
163 school day. The recent case of a pupil in Terni (Italy), who suffered from respiratory distress after  
164 wearing a mask for an extended period of time (in compliance with the school internal policy),  
165 suggests that in a realistic scenario, students will be occasionally removing their masks while  
166 maintaining social distancing. For instance, a recommendation by some EU local scientific  
167 committees as of October 2020, is to wear masks for as long as possible, but to allow their  
168 occasional removal as long as social distancing is respected. In the scenario of a real classroom,  
169 more "cautious" values of 0.85 for wearing masks 100% of the time and 0.45 for wearing it half  
170 of the time were adopted.

171 The total viral load in the environment volume, in the presence of one infectious subject with a  
172 rate of emission  $ER_q > 0$ , is given by:

173 
$$n(t) = \frac{ER_q}{N} + \left[ n_0 - \frac{ER_q}{N} \right] e^{-Nt} \quad (4)$$

174 *Cumulative Risk*

175 In the present work, the GN-model was extended in order to account for cumulative risk. In a  
 176 scenario where the infectious source is removed from the environment (e.g. student or teacher  
 177 leaving the classroom), the  $ER_q$  parameter in Eq (3) and (5) would become zero. However, we can  
 178 observe that even when  $ER_q=0$  in (3), the infection risk  $R_q^{GN}(t)$  would remain greater than zero,  
 179 because of the multiplicative factor  $\varphi_q(t)$  (and intuitively, due to the viral load already present in  
 180 the environment). Hence, equations (3) and (4) become:

181

182 
$$R_{ERq=0}^{mask}(t) = 1 - e^{[-(1-f_{out})(1-f_{in})\frac{pn_0}{NV}(e^{-Nt}-1)]} \quad (5)$$

183 
$$n_{ERq=0}(t) = n_0 e^{-Nt} \quad (6)$$

184

185 The probability of infection during the  $i$ -th lecture of duration  $t_{lec}$ , followed by the  $i$ -th break of  
 186 duration  $t_{brk}$ , assuming that one infectious subject is present and the starting viral load is  $n_0$ ) is  
 187 then a composed function:

188

189 
$$R_i(t) = \begin{cases} R_{lec,i}(t) = 1 - e^{[-\frac{pERq}{V} \varphi_i(t, n_{0,i}, N)]} & \text{if } 0 \leq t \leq t^{lec} \\ R_{brk,i}(t) = 0 & \text{if } t^{lec} < t < t^{lec} + t^{brk} \end{cases} \quad (7)$$

190

191 And the same for the total viral charge in a classroom:

192

193 
$$n_i(t) = \begin{cases} n_{lec,i}(t) = \frac{ERq}{N} + [n_0 - \frac{ERq}{N}] e^{-Nt} & \text{if } 0 \leq t \leq t^{lec} \\ n_{brk,i}(t) = [n_{lec,i}(t^{lec})] e^{-N(t+t^{lec})} & \text{if } t^{lec} < t < t^{lec} + t^{brk} \end{cases} \quad (8)$$

194

195 The ventilation profile  $N(t)$  appears in  $\varphi_i(t, n_{0,i}, N(t))$  in equation (7) and in equation (8). It is  
 196 a two-values function given by:

197 
$$N_i(t) = \begin{cases} N_{min} & \text{if } 0 \leq t \leq t^{lec} \\ N_{max} & \text{if } t^{lec} < t < t^{lec} + t^{brk} \end{cases} \quad (9)$$

198

199 The different N profiles employed are illustrated in Fig. 2 where  $N_{\max}$  changes depending on the  
200 ventilation system (mechanical or natural).

201 During a break, if students/pupils will leave the environment where the viral aerosol has gradually  
202 accumulated, it is logical to assume that R would not increase (in that classroom) and will therefore  
203 remain constant. This is also reasonable in the light of the fact that during lesson time the number  
204 of subjects in the corridors is very small in comparison to classrooms, and generated viral load in  
205 corridors would also be diluted in a much larger total volume than that of a single classroom.

206 Therefore, the risk of airborne infection during breaks in Eq. (5) has been assumed to be zero.  
207 When considering the total number of infections at a given time point t (after a certain number of  
208 classes and breaks) this is given by the product  $R(t)S_0$ , where  $S_0$  represents the number of  
209 susceptible subjects in the classroom from  $t = 0$ . In this situation, the variable of practical interest  
210 is not the risk of infection during a single lecture,  $R_{lec,i}(t)$ , (which would become zero after each  
211 break), but rather the *cumulative risk*  $R_{c,i}(t)$  at the time t, which keeps into account the whole  
212 "history" of infection risk up to that point:

$$213 \quad R_{c,i}(t) = \frac{C_i(t - (i - 1)(t^{lec} + t^{brk})) + \sum_{j=1}^{i-1} C_j(t^{lec}, n_{0j})}{S_0} =$$

$$214 \quad = R_{lec,i}(t - (i - 1)(t^{lec} + t^{brk})) + \sum_{j=1}^{i-1} R_{lec,j}(t^{lec}, n_{0j}) \quad (10)$$

216 In (10),  $C_j(t)$  represents the number of infections in the previous hours and the index j spans all  
217 the "cycles" of lecture+break before the current i-lesson (j=1 to i-1). The underlying assumption,  
218 which is valid at least in Italian secondary schools, is that the susceptible subjects at the beginning  
219 ( $S_0$ ) remain always the same and do not vary over the course of the school day. To better  
220 understand the importance of cumulative risk, we introduce a practical example. If the classroom  
221 were to be completely sanitised and the air completely renewed during the first lecture break, it  
222 may seem intuitive to reset the infection risk to zero at the beginning of the subsequent lecture.  
223 However, based on the definition of infection risk after an exposure time t as  $C(t)/S_0$ , where C(t)  
224 is the total number of infected subjects at time t, this would be equivalent to neglecting possible  
225 infections that occurred in the previous hour, and monitoring only new ones. In our view, the risk  
226 factor R needs to be the answer to the following question: "What is the probability of  $S_0$  initial  
227 susceptible subjects to be infected, after sharing the same space for a given number of hours?".  
228 Hence the need to account for the whole fraction of infections from time zero, and not the  
229 probability of infections during one single teaching hour. The same logic applies when one wants  
230 to compare risk curves with infection probability thresholds in a classroom with n students / pupils.  
231 For at least one infection to occur, the cumulative risk  $R_c(t) = C(t)/S_0$  must be greater than  $1/n$ .  
232 Therefore, the condition for zero infections to occur over the total time spent in the classroom is:

$$233 \quad R_c(t) < 1/n \quad (11)$$

234 as opposed to  $R_{lec,i}(t) < 1/n$  as suggested in other analyses, while the condition to exclude k likely  
235 infections will be:

$$236 \quad R_c(t) < k/n \quad (12)$$

237

238 *Influence of lecture and break durations on the total risk of contagion*

239

240 At the end of a typical school day, which can be assumed to last 5 hours (300 min), if one positive  
241 student was in the classroom during all lectures, one obtains the total risk of infections as:

242

243 
$$R_c(t = 5h, t^{lec}, t^{brk}) = R_{c,5h}(t^{lec}, t^{brk}) =$$

244 
$$= \sum_{j=1}^k \left( 1 - e^{\left[ -\frac{pERq}{V} \varphi(t^{lec}, n_{0j}[j(t^{lec}+t^{brk})]) \right]} \right) + \left( 1 - e^{\left[ -\frac{pERq}{V} \varphi(5h-k(t^{lec}+t^{brk}), n_{0,k}) \right]} \right) \quad (13)$$

245

246 In (12),  $k = \left\lfloor \frac{5h}{t^{lec}+t^{brk}} \right\rfloor$  is the integer number of periods (lesson + break) before the last period. One  
247 may observe that the last lecture window could be less than  $t^{lec}$  in order not to overcome 5h of  
248 total lectures+breaks time. This is the reason why the last contribution to  $R_c$  is written  
249 separately and the last lecture window is then calculated over a time interval  $t = 5h -$   
250  $(i - 1)(t^{lec} + t^{brk})$  in order to complete the 5 hours.

251 Equation (9) shows that for a given classroom at the end of a school day, the only variables  
252 influencing the cumulative risk of airborne contagion (and the total number of infections) are: 1.  
253 the time duration of lectures ( $t^{lec}$ ) and 2. the time duration of breaks ( $t^{brk}$ ), since the other model  
254 parameters ( $V, N, p, ERq, f_{out}, f_{in}$ ) are fixed for a given classroom.

255



256 *Influence of ventilation rate (N)*

257 The influence of natural ventilation in the GN model is summarised by the parameter N in equation  
 258 (2). It must be pointed out that natural ventilation and therefore N are in turn affected by several  
 259 factors, such as the difference of air temperature between the indoor and outdoor space, the wind  
 260 direction and average wind speed, as well as geometric factors such as window size and position,  
 261 etc. [Marr 2012]. The exact calibration of such parameters would be specific to each individual  
 262 building, or even to each individual classroom within a given building. Such detail however lies  
 263 outside the scope of this paper. In the present study we will simply explore the quantitative  
 264 relationship between different levels of natural ventilation (summarised by different values of N)  
 265 and the infection risk factor R. In the case of static natural ventilation, the range of values  
 266 commonly found in the literature lies between 0.2 and 1 vol/h, with peaks of 1.5 vol/h (based on  
 267 experimental measurement of CO<sub>2</sub> concentrations before and after opening windows [Marr 2012,  
 268 Escombe 2007]).

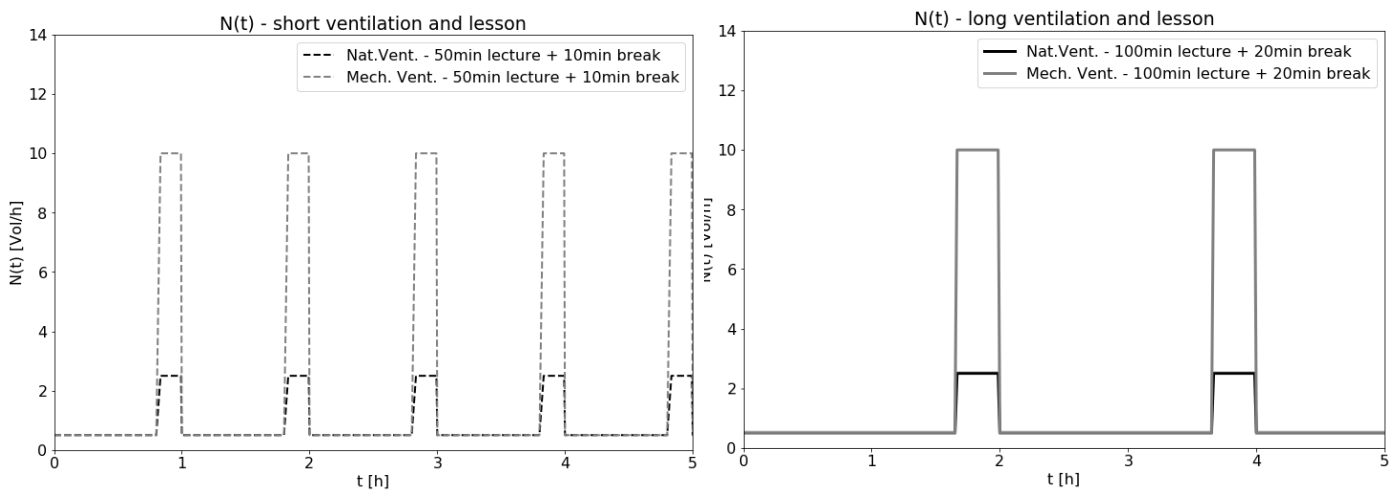

269

270 **Figure 2** Ventilation profiles used in the present analysis.  $N_1, N_3(t)$  assumed 50-min lectures alternated with 10-min  
 271 breaks, whereas  $N_2, N_4(t)$  assumed 100-min lessons and 20-min breaks.  $N_{1,3}$  peaked at 2.5 Vol/h (windows open), and  
 272  $N_{2,4}$  peaked at 10 Vol/h. The latter value can only be achieved through mechanical ventilation

273

274 *Influence of source emission rate and choice of  $ER_q$  values*

275 It is important to stress the critical importance of the parameter  $ER_q$  in Eq. (2). Very recent studies  
 276 [Buonanno 2020] suggest that the value of  $ER_q$  can span at least two orders of magnitude, between  
 277 0.7 and 70 quanta/h for a resting person (student) and 0.9 and 80 quanta/h for a standing person  
 278 (teacher) who can be required to talk for several hours a day. Given the uncertainty surrounding  
 279 the exact value of  $ER_q$ , we explored several scenarios assuming low (optimistic) and high  
 280 (pessimistic) values for  $ER_q$ , all carefully chosen in a range suggested by recent literature  
 281 [Buonanno 2020], [Pan 2020], [Watanabe 2010].

282

## 283 Simulation results

284 Simulation results are reported in Figs. 3 and 4, where cumulative risk curves  $R_c(t)$  were calculated  
285 with the extended dynamic single-zone GN model comparing different scenarios in a typical high  
286 school classroom of volume  $8 * 7 * 3 \cong 170 \text{ m}^3$ . Two situations were separately considered: First,  
287 one positive student (Fig. 3) remained for 5 h in the same classroom of volume  $V$  (except for break  
288 intervals). Second, a teacher positive for infection in the same classroom (Fig 4) was supposed to  
289 remain for 2 hours only with different  $ER_q$  levels. On average, a high school teacher stays in the  
290 same classroom not more than two hours a day, and after this time she/he usually moves to a  
291 new classroom. Importantly, estimated risk levels by definition with Equations (5)–(6) are  
292 independent from “classroom crowding”—that is, from the number of individuals  $S_0$  at  $t = 0$  (when  
293 lectures begin). This is due to the GN-model assumptions, which include 1. instantaneous, perfect  
294 (isotropic) mixing of the viral charge emitted by the source and 2. all susceptible persons equally  
295 exposed to the airborne risk (since the viral cloud after some time is perfectly mixed in the volume).  
296 However, other contagion channels like coughing and surface contact were neglected in this  
297 analysis.

298 Red curves show the lowering effect of pure natural ventilation (opening windows), and orange  
299 curves show that of mechanical ventilation at high power during breaks (air change rate  $N$   
300 increasing almost to a factor of 10). In these curves, face masks were intentionally not included in  
301 order to isolate the net contribution of air ventilation. The additional contribution of surgical face  
302 masks is then shown in the blue curves (natural ventilation + face masks worn 50% and 100% of  
303 the time, respectively). For each mitigation factor, two different lecture + break profiles are  
304 compared in terms of single-time-period duration. That is, continuous plots refer to more frequent  
305 but shorter breaks  $(t^{lec}, t^{brk})_1 = (50, 10) \text{ min}$ , whereas dashed plots refer to doubled break and  
306 lecture times:  $(t^{lec}, t^{brk})_2 = (100, 20) \text{ min}$ . Remarkably, as shown in the dashed curves of Fig. 1 and  
307 Fig. 2, shorter but more frequent breaks  $(t^{lec}, t^{brk})_1$  perform better in terms of risk, and one may  
308 achieve the desired goal of zero infections even after 5 h (blue dashed curves) by combining  
309 frequent window opening at sufficiently high  $N$  (full aperture) with mask wearing.  
310 The deviation of red curves from the reference curve (denoted in black, showing the absence of  
311 any mitigation/dilution factor) shows the very significant impact of natural ventilation alone,  
312 quantifiable in an average reduction of risk of almost 50% at a lecture’s end.

313 The important mitigation effect of surgical masks (under the assumption they are worn by all  
314 subjects) can be quantified in an additional reduction of 30–45 % from the reference curve  
315 (depending on the effective time they are properly worn). Again, only a combination of masks and  
316 natural ventilation may reduce risk levels below the one-contagion threshold (grey horizontal lines  
317 in Fig. 3). In fact, to completely eliminate any airborne contagion in a typical classroom of 15, 25,  
318 or 30 students where an infectious subject is present, the value of  $R$  at the end of all lectures must  
319 stay below  $1/15$ ,  $1/25$ , or  $1/30$ , respectively (= 6.7%, 4%, or 3.3%). In addition, this clearly  
320 indicates the need to keep the number of students per classroom as low as possible because the  
321 contagion threshold lowers as  $S_0$  increases.

322 The case of the infectious teacher (Figs. 4a and 4b) shows remarkable differences in the shape of  
323 risk curves compared with those of the positive student case (Figs. 3a and 3b). For the teacher  
324 case, higher levels of  $ER_q$  were required in order to account for a higher (average) speak activity.  
325 Even if staying in a classroom for only two hours, an infectious teacher speaking most of that time  
326 will be a much greater viral source than a student (on average), and the corresponding risk curves  
327 will increase more steeply in the first 2h. After a teacher left the room, the  $ER_q$  in that room  
328 dropped to zero, but the viral charge emitted by him/her was still present (although it lowered  
329 after a number of hours—see the  $n(t)$  curves of Figs. 4c and 4d). A resting load, however, would  
330 cause a further (although lower) increase of  $R_c$  during the next hours, even if the teacher were no  
331 longer present in that classroom. In addition, the one-infection threshold via airborne transmission  
332 for a class of 30 students wearing masks half of the time (a realistic scenario) was reached much  
333 faster in the case of an infectious teacher. That is, the time-to-one-contagion was about 1 h in the  
334 optimistic scenario (low  $ER_q$  level) and even less than 1 h with a high  $ER_q$  level. For subjects

335 exposed to an infectious student, the time-to-one-contagion was much higher, varying from about  
 336 2.4 h (pessimistic case, high  $ER_q$ ) to 4.5 h (optimistic case, low  $ER_q$ ). Notably, all  $ER_q$  values  
 337 employed were compatible with published data [Buonanno 2020] for standing and resting people  
 338 (reported also in appendix - Fig. A1).

339

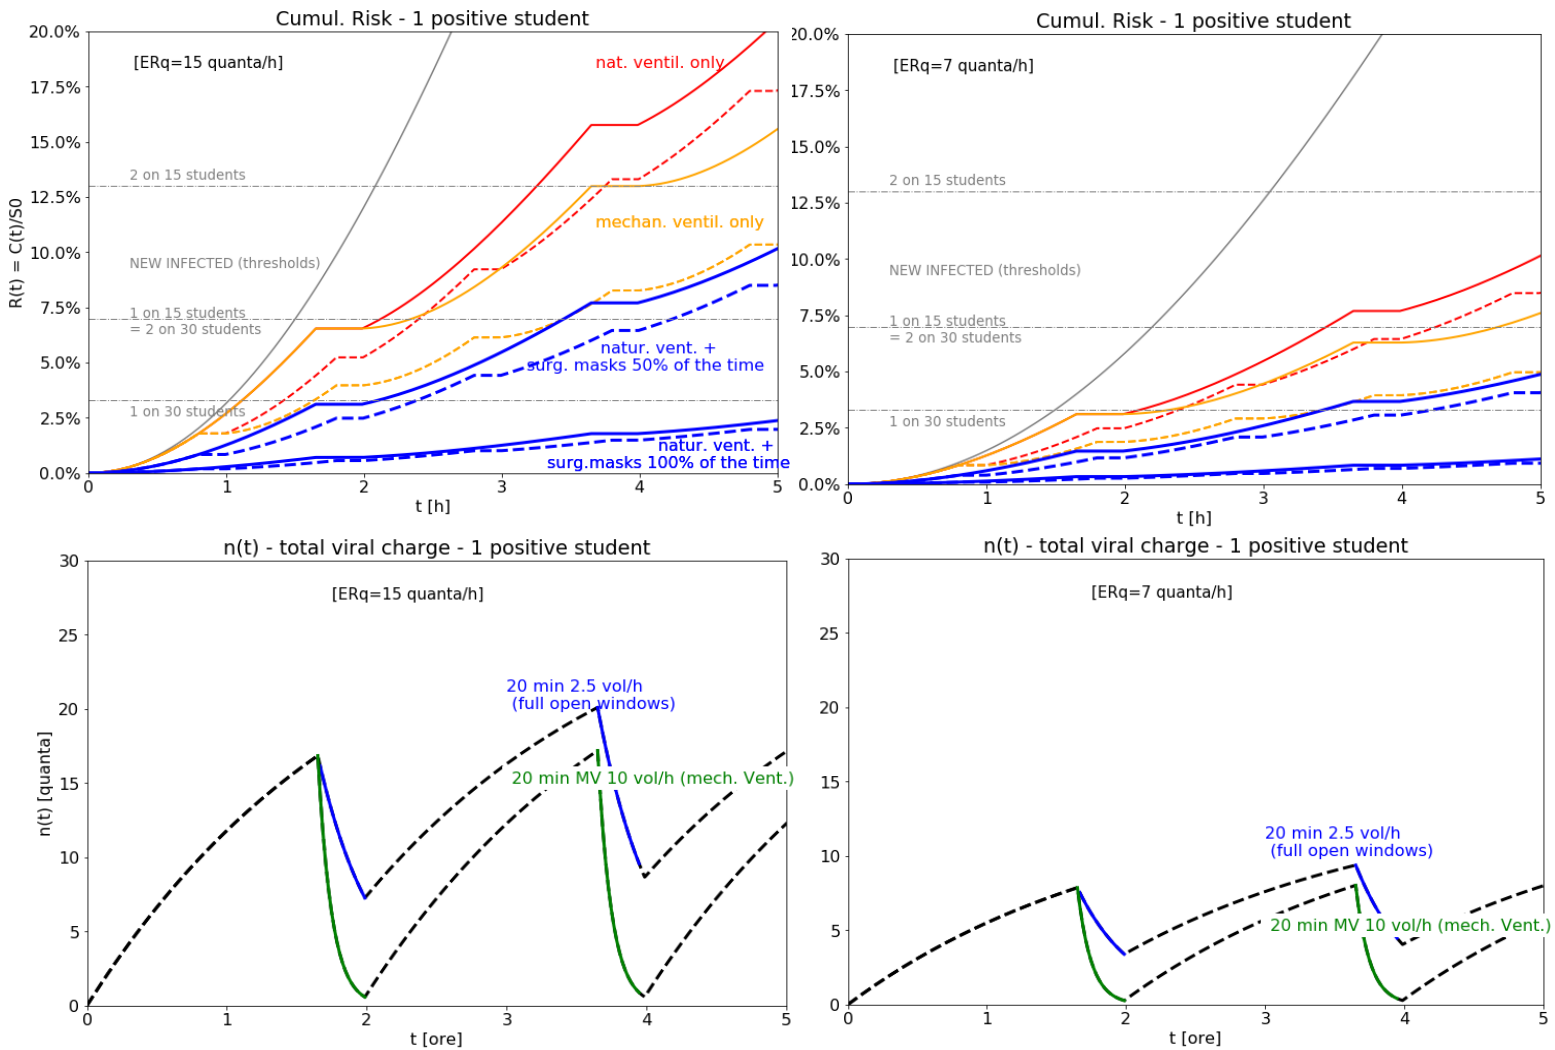

340

341 **Figure 3** Top: cumulative risk curves of indirect airborne transmission as a function of exposure time, considering a  
 342 standard classroom ( $V = 170 \text{ m}^3$ ). a) Pessimistic scenario calculated with high  $ER_q$ . b) Optimistic scenario with low  
 343  $ER_q$ . Natural and mechanical ventilation profiles refer to Fig.2. Bottom: time evolution of viral charge in classroom in  
 344 natural (open windows) cases and with mechanical ventilation.

345

346

347

348

349

350

351

352

353

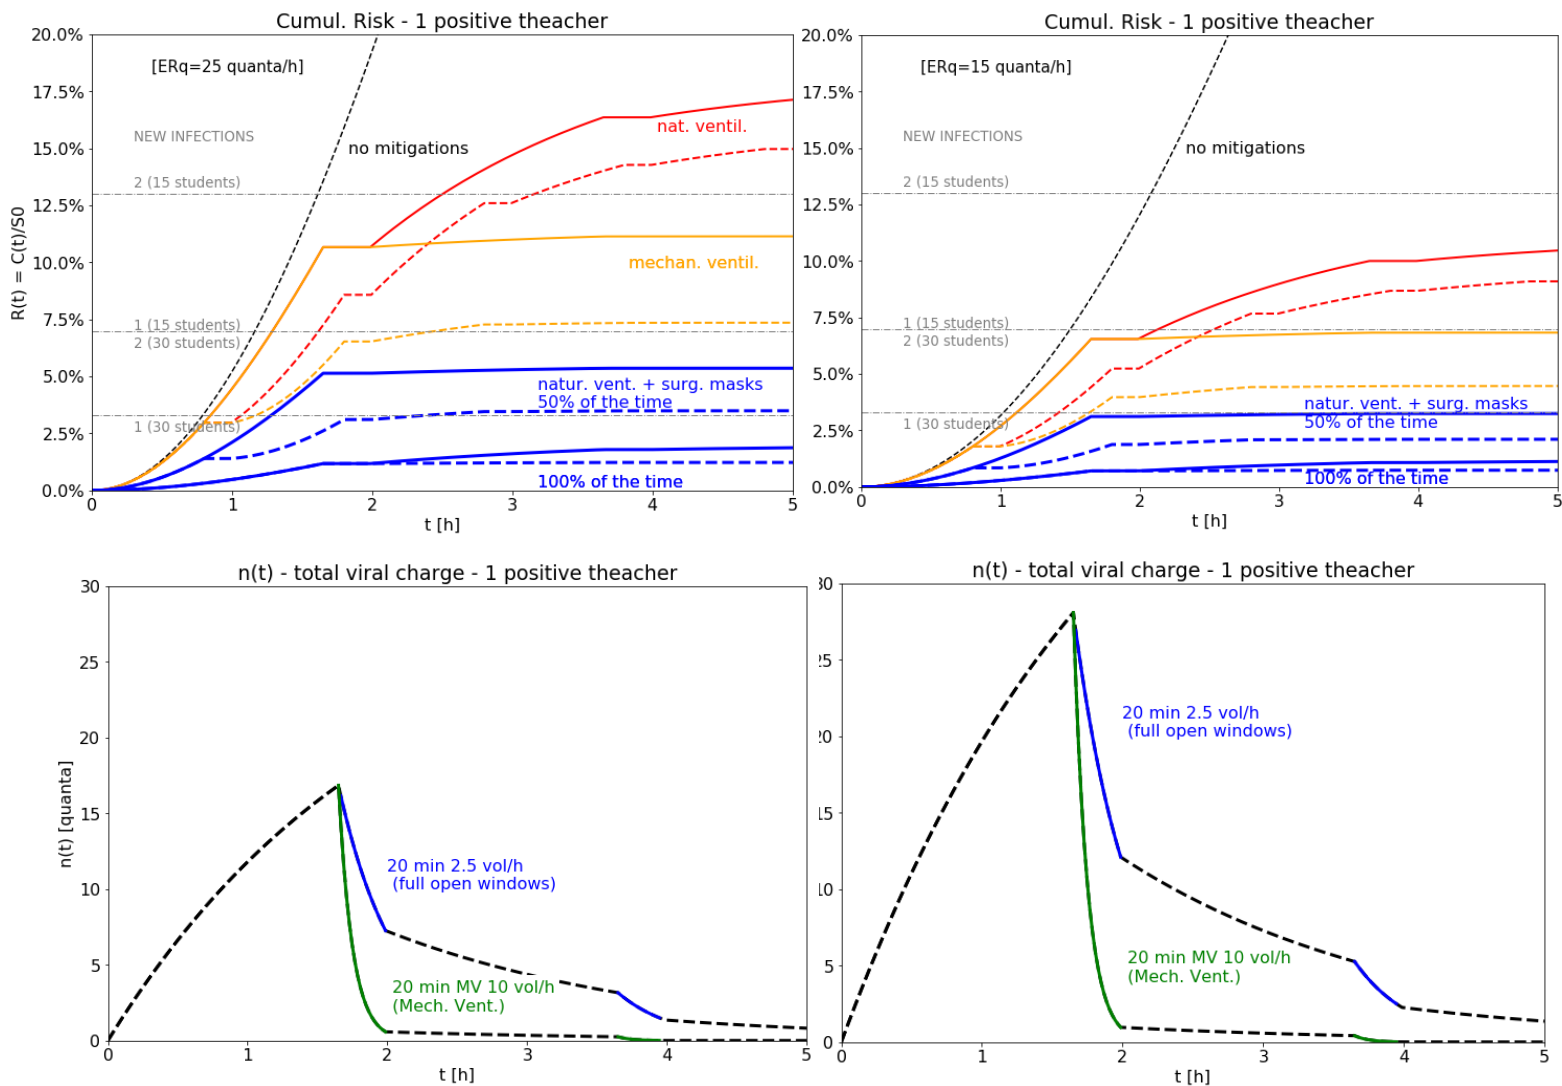

354

355 **Figure 4** Top: cumulative risk curves for the case of an infected teacher in a classroom of volume  $V = 170 \text{ m}^3$  for 2  
 356 hours as a function of exposure of subjects. Pessimistic (left) vs optimistic (right) scenarios calculated with high  $ER_q$   
 357 (a) and low  $ER_q$  (b), respectively. Natural and mechanical ventilation profiles refer to Fig.2. Bottom: time evolution of  
 358 viral charge in classroom in natural (open windows) cases and with mechanical ventilation

359

## 360 *Comment on Mechanical Ventilation*

361 Obviously, mechanical ventilation would be an even more desirable option in winter to increase N  
362 without opening the windows, but the vast majority of school buildings worldwide do not have  
363 HVAC systems. In addition, Fig. 3 shows that mechanical ventilation alone (active during breaks)  
364 is not enough to reduce the risk below the one-contagion threshold, even at  $N = 10$  vol/h.  
365 Furthermore, reducing the airborne risk without masks through mechanical ventilation systems  
366 only would require permanently cutting the power of air ejectors at high speeds during classes (to  
367 keep high values of N while lowering R). This would require a complete redesign of current HVAC  
368 systems in schools (if present) while posing challenges for acoustic insulation. For these reasons,  
369 the scenario of permanent mechanical ventilation at high N was excluded from the present  
370 analysis.

## 371 *Optimum ventilation profiles and safety zones*

372 As previously stated, a significant risk reduction could be obtained with more frequent ventilation,  
373 even without face masks. In fact, for a given classroom, the risk at the end of a school day (usually  
374 after five hours of classes) can be expressed as a function of two variable parameters,  $t^{lec}$  (lecture  
375 time) and  $t^{brk}$  (duration of breaks), as illustrated in Equation (10). Thus, there is motivation for  
376 finding an optimal set of  $t^{lec}, t^{brk}$  that would minimize  $R_{c,5h}(t^{lec}, t^{brk})$ , noting that only limited  
377 actions can be undertaken to change the other exogenous parameters. Beyond this, classroom  
378 volumes are mostly fixed (except for the very few cases in which new spaces have been allocated  
379 in the current year). Second, acting on mask filter capabilities has also been limited. That is, one  
380 may think it would improve the mask parameters out and fin by requesting students to wear ffp2  
381 masks all of the time, but this prescription has been excluded by most regulators. This is because  
382 wearing high-filtering masks in school contexts for long periods appears inappropriate and may  
383 expose students to other risks. Finally, ERq and p cannot be controlled: whereas “p – average  
384 pulmonary inflation rate” is fixed in the human body and reasonably known, the critical parameter  
385 ERq depends on actual habits/behaviors, and its values are parametrically varied in bounded  
386 ranges to limit uncertainty. In any case, both ERq and p cannot be controlled by legislation or by  
387 feasible countermeasures. Instead,, acting on ventilation (N) is feasible and can be effective, as  
388 shown in this study. However, maximizing N in winter would require mechanical ventilation and  
389 operating HVAC systems, lacking in most schools. One can act now only by opening windows for  
390 significant periods of time to increase the air exchange and dilution of the viral load. To act on the  
391 duration of breaks ( $t^{brk}$ )—when N is the maximum—and the duration of lectures ( $t^{lec}$ )—when N is  
392 the minimum—one must aim at identifying an optimum ventilation schedule  $N_{opt}(t)$  that minimizes  
393 the cumulative risk within certain boundaries. The two-variable risk function to be minimized is  
394 therefore  $z = R_{c,5h}(t^{lec}, t^{brk})$  and is represented in Fig. 5 a, b, c, and d and the related contour plot  
395 of Fig. 6. As evident, a minimum exists at around  $(t^{lec}, t^{brk}) \approx (30min, 50min)$ , since the z function  
396 shows a clear monotonic behavior in the surrounding of the x=y direction. This would imply an  
397 unusual recommendation: class breaks should last longer than the classes themselves. This fact is  
398 eventually unsurprising, since opening more windows during breaks implies a higher N-level than  
399 during classes, which was considered in this analysis (Fig. 2). In addition, this fact is dictated by  
400 practical requirements. That is, with low outdoor temperatures (particularly in January–February  
401 in schools located in the Northern Hemisphere) and a concurrent risk for other seasonal diseases,  
402 it is only during lesson “breaks” that one could realistically increase N by fully opening the windows  
403 in a classroom.

404 However, since overly long breaks may also cause practical and organizational difficulties for  
405 schools, wider “safety zones” for the variation of  $t^{lec}, t^{brk}$  are recommended in Fig. 6. These zones  
406 are defined below so-called “one-infection thresholds” (varying for different values of the number  
407  $S_0$  of students per classroom). A certain combination of  $t^{lec}, t^{brk}$  from the safety zone would thus  
408 provide sufficient ventilation and dilution of the viral load to lower the risk for new indirect

409 infections below  $1/S_0$ . That is, no infections would be expected in a group of  $S_0$  susceptible  
410 individuals if the room were ventilated for an equal period of time ( $t_{safe}^{brk}$ ) at every class break. For  
411 instance, in a classroom of 30 students, one should require both breaks and classes to last for  
412 approximately 50 min to be safe, whereas in a classroom of only 20 students, the wider “safe  
413 zone” in Fig. 6 would allow lessons of 55 min, combined with breaks of 25 min.

414

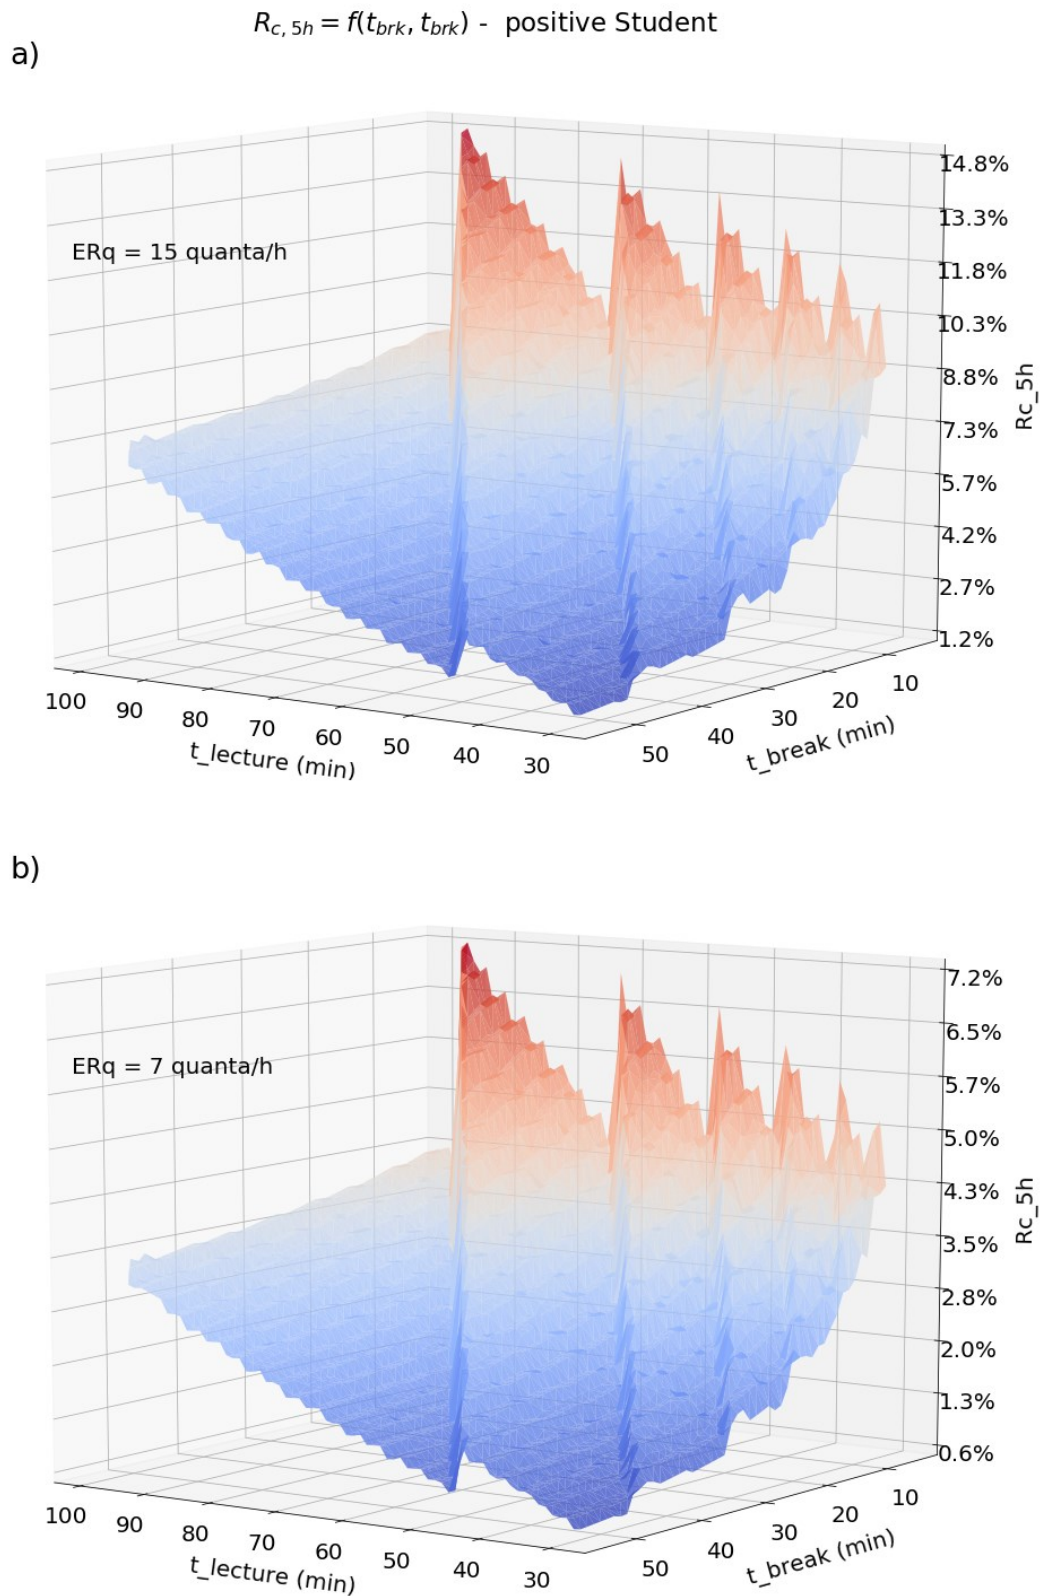

415  
416  
417  
418  
419

**Figure 5** – a,b) Cumulative contagion risk function after 5h exposure  $R_{c,5h}$  as a function of lecture and break duration ( $t^{lec}, t^{brk}$ ) for high (a) and low (b) emission rates of the infective source. Hypothesis: one infective student in a classroom of 170 m<sup>3</sup> and face mask effective for 50% of the time ( $f_{in}=0.15, f_{out}=0.45$ )

$$R_{c,5h} = f(t_{brk}, t_{brk}) - 1 \text{ positive Teacher}$$

c)

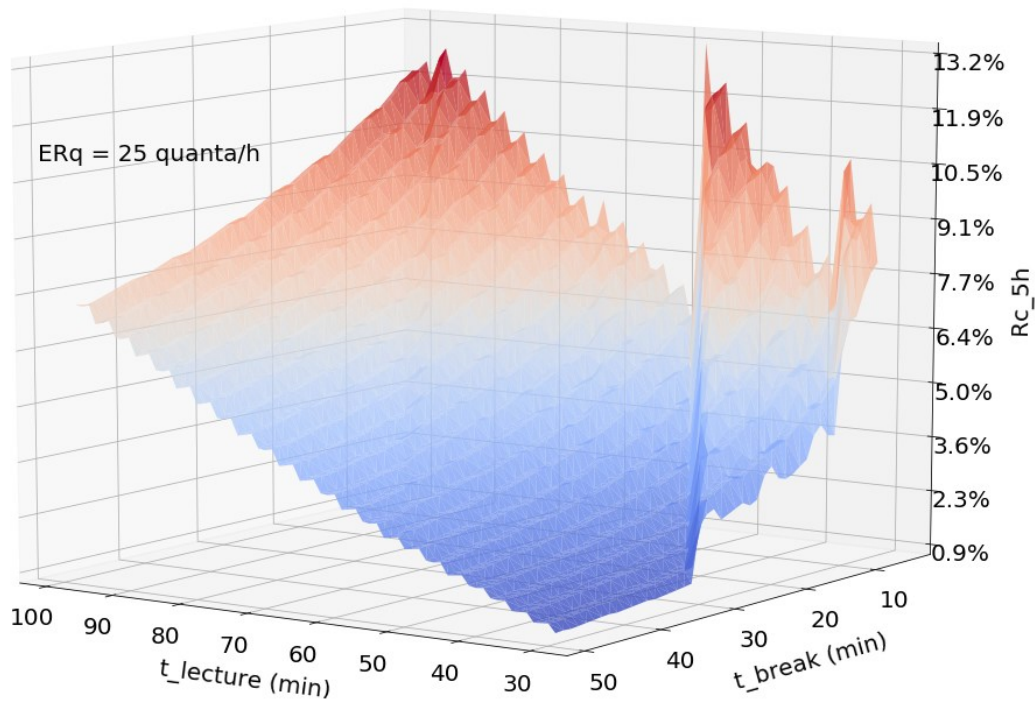

d)

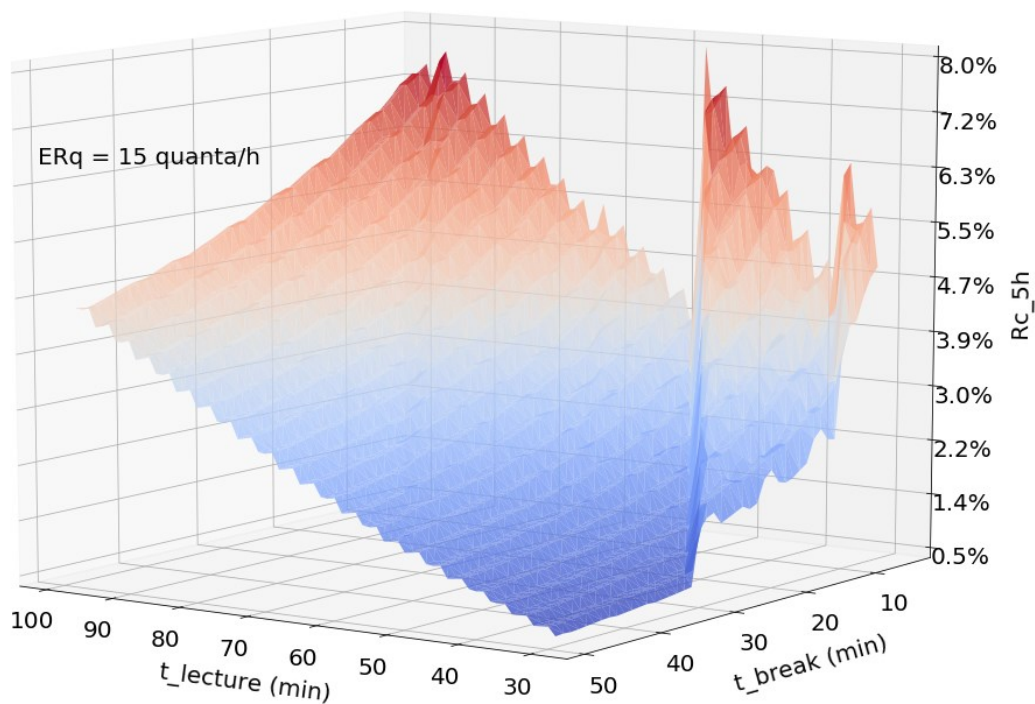

420

421 **Figure 5 – c,d)** Contagion risk function  $R_{c,5h}(t^{lec}, t^{brk})$  in the case of infective teacher, for high (c) and low (d)  
422 emission rates. Hypothesis: one infective student in a classroom of 170 m<sup>3</sup> and face mask effective for 50% of the  
423 time ( $f_{in}=0.15$ ,  $f_{out}=0.45$ )

424



425

426

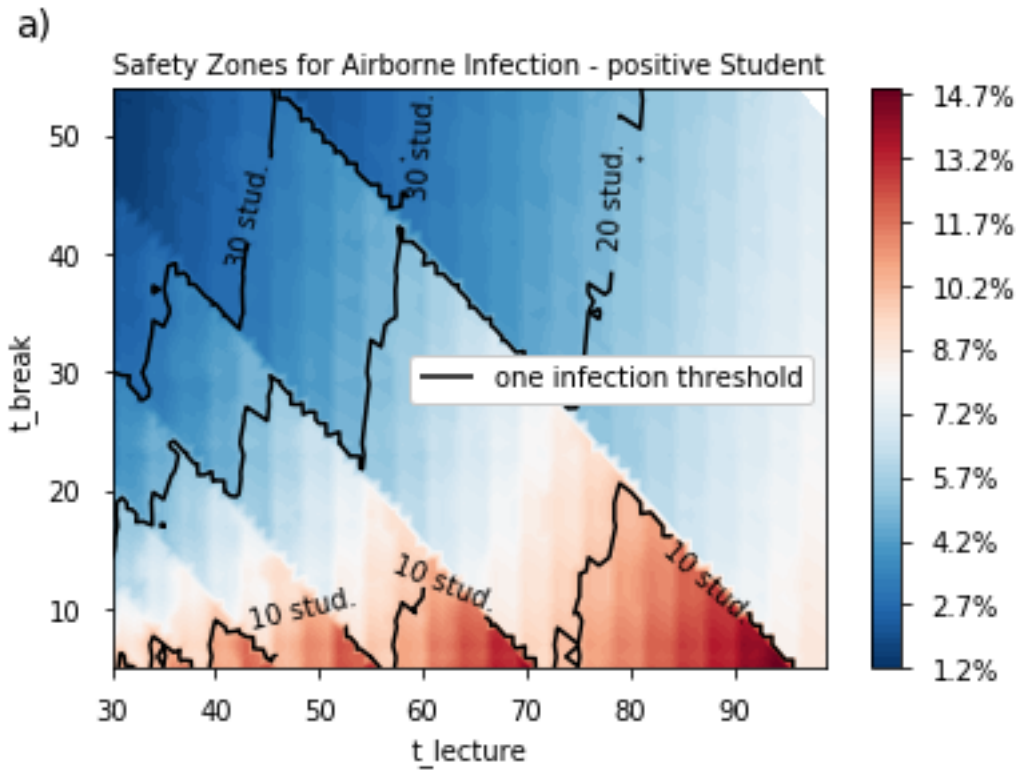

427

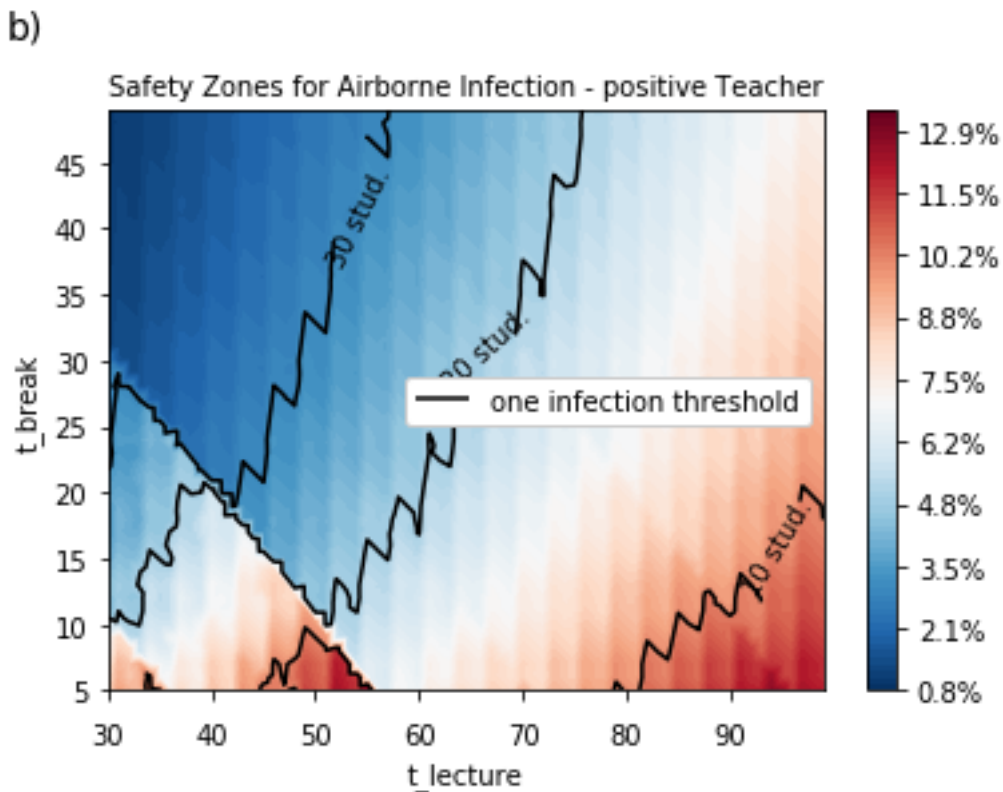

428

429 **Figure 6** – Contour plots of the contagion risk function after 5 h of exposure,  $R_{c,5h}(t^{lec}, t^{brk})$ . a) Positive student and  
 430 b) positive teacher cases. Continuous lines indicate “one infection thresholds” for different values of the number of  
 431 susceptible students per classroom ( $S_0$ ) therefore defining “zero infection areas” enclosed below threshold lines (safety  
 432 zones) for the parameters  $t^{lec}$  and  $t^{brk}$ . Thus, in a class of 30 students, a combination of  $t^{lec}$ ,  $t^{brk}$  from the safety zone  
 433 (blue area at the top left) would provide sufficient ventilation and dilution of the viral load to allow the probability of new  
 434 contagions to stay below one over 30 (3.3%).

## 435 *Conclusions*

436 Cumulative risk is the key to understanding airborne SARS-CoV-2 infections in schools. This  
437 originates from the cumulative nature of air saturation and viral aerosol formation. Furthermore,  
438 students and teachers exposed in schools for long periods of time to possible infection sources  
439 and standard sanitation/ventilation cycles during breaks cannot lower the residual viral load in  
440 their environment to zero. On the contrary, it has been shown that a small amount of this load  
441 would still be present in a classroom even after ventilation cycles at high  $N$ , with students leaving  
442 classrooms during breaks. On the other hand, an infectious student re-entering a classroom  
443 would continue to emit viral quanta, and an infectious teacher remaining in the room for a  
444 number of hours could emit sufficient viral quanta to indirectly infect other people, even after  
445 she/he exited the classroom. Although the dynamic single-zone model employed contains some  
446 approximations, a clear indication arises from this theoretical analysis: Windows in schools  
447 should be kept open most of the time to decrease the airborne risk to acceptable levels. Since  
448 students may leave classrooms at every break, schools could increase the ventilation during  
449 breaks to prevent temperature discomfort and other seasonal diseases from resulting during  
450 lectures.

451 Furthermore, numerical results have indicated that windows should be fully (not partially) open  
452 during breaks and that breaks should possibly last as long as possible. However, since these  
453 recommendations would cause considerable discomfort in the winter (and would increase the risk  
454 of contracting other diseases), a compromise is necessary. Safety regions—aside from the  
455 numerical optimum—have been identified for break and lecture durations (i.e., the parameters  
456 influencing ventilation profiles and therefore dilution of viral charge have been established).  
457 During optimization, dilution and lowering of contagion risk curves in this study were based  
458 entirely on natural ventilation cycles (i.e., opening windows) rather than on mechanical  
459 ventilation (which is expected in future upgrade of schools but is not currently present in most  
460 schools). Results of the minimization of the  $R_{c5h}$  function indicate f.i. that alternating lectures of  
461 55 min with breaks of 25 min would keep the contagion risk below the zero-infection-threshold in  
462 groups of 20 students. Since the number of students per classroom also plays a critical role in  
463 contagion thresholds, break durations should be longer for larger groups and could be shorter for  
464 smaller classes. Thus, it may be wise to have smaller class sizes to control airborne transmission  
465 in schools. Finally, as has been confirmed by others, only the combination of optimal air  
466 exchange cycles and surgical masks permanently worn by all individuals could lower the risk of  
467 airborne contagion within school buildings to the desirable level of zero contagions.

468

469 APPENDIX

470

471 Values of the ERq parameter used in the numerical simulations are taken from [Buonanno 2020]  
 472 and reported in Fig. A.1 (orange and blue lines).

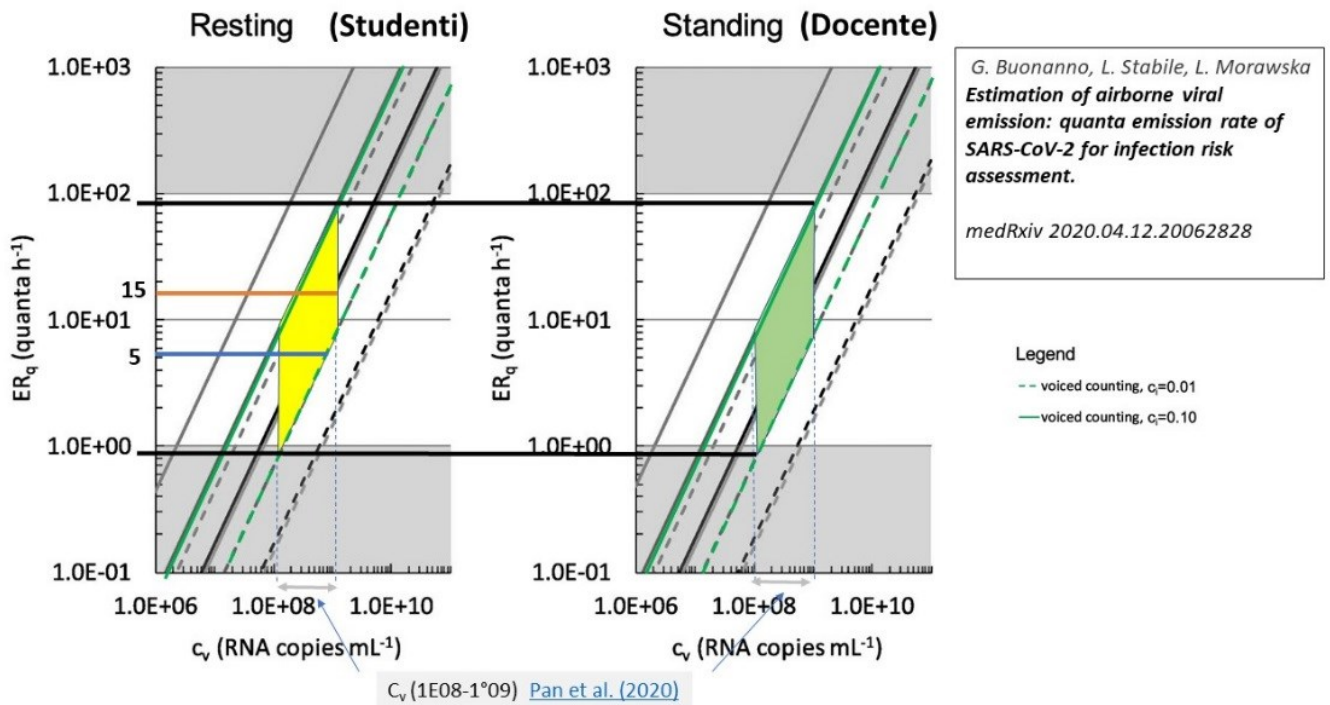

473 **Figure A.1.** Range of variation for ERq for resting and standing individual as published in [Buonanno 2020]. The  
 474 values chosen in the present study are highlighted in blue and orange. The yellow and green zones originates by the  
 475 viral parameters  $c_i$  and  $c_v$  [Pan et al. 2020].

476

477

## 478 Bibliography

- 479 [Leung 2020] Leung, N.H.L., Chu, D.K.W., Shiu, E.Y.C. et al. Respiratory virus shedding in exhaled breath and efficacy of face  
480 masks. *Nat Med* 26, 676–680 (2020). <https://doi.org/10.1038/s41591-020-0843-2>
- 481 [Morawska 2020-1] Lidia Morawska, Donald K Milton, It is Time to Address Airborne Transmission of COVID-19, *Clinical*  
482 *Infectious Diseases*, ciaa939, <https://doi.org/10.1093/cid/ciaa939>
- 483 [Morawska 2020-2] Lidia Morawska, Julian W. Tang, William Bahnfleth, et al. How can airborne transmission of COVID-19  
484 indoors be minimised? *Environment International*, Volume 142, 2020, 105832, ISSN 0160-4120,  
485 <https://doi.org/10.1016/j.envint.2020.105832>.
- 486 [Allen 2020] Allen JG, Marr LC. Recognizing and controlling airborne transmission of SARS-CoV-2 in indoor  
487 environments. *Indoor Air*. 2020;30(4):557-558. doi:10.1111/ina.12697
- 488 [Escombe 2007] Escombe AR, Oeser CC, Gilman RH, et al. Natural ventilation for the prevention of airborne contagion. *PLoS*  
489 *Med*. 2007; 4(2):e68. <https://doi.org/10.1371/journal.pmed.0040068>
- 490 [Buonanno 2020] G. Buonanno, L. Stabile, L. Morawska. Estimation of airborne viral emission: Quanta emission rate of SARS-  
491 CoV-2 for infection risk assessment, *Environment International*, Volume 141,2020, 105794, ISSN 0160-4120,  
492 <https://doi.org/10.1016/j.envint.2020.105794>.
- 493 [AICARR 2020] AICARR - Protocollo per la riduzione del rischio da diffusione del SARS-CoV-2 nella gestione e manutenzione  
494 degli impianti (to be changed with corresponding ASHRAE protocol )
- 495 [Gammaitoni 1997] Gammaitoni L., Nucci M.C. 1997. Using a mathematical model to evaluate the efficacy of TB control  
496 measures. *Emerging Infectious Disease*, 3, 335-342.
- 497 [Knibbs 2011] Knibbs LD, Morawska L, Bell SC, Grzybowski P. Room ventilation and the risk of airborne infection transmission  
498 in 3 health care settings within a large teaching hospital. *Am J Infect Control*. 2011 Dec;39(10):866-72.. Epub 2011 Jun 12. PMID:  
499 21658810 doi: <https://doi.org/10.1016/j.ajic.2011.02.014>
- 500  
501 [Smereka 2020] Smereka, J., Ruetzler, K., Szarpak, L., Filipiak, K. J., & Jaguszewski, M. (2020). Role of mask/respirator  
502 protection against SARS-CoV-2. *Anesthesia and analgesia*, 10.1213/ANE.0000000000004873. Advance online publication.  
503 <https://doi.org/10.1213/ANE.0000000000004873>
- 504 [Pan 2020] Pan, Y., Zhang, D., Yang, P., Poon, L. L. M., & Wang, Q. (2020). Viral load of SARS-CoV-2 in clinical samples. *The Lancet*  
505 *Infectious Diseases*, 20(4). [https://doi.org/10.1016/S1473-3099\(20\)30113-4](https://doi.org/10.1016/S1473-3099(20)30113-4)
- 506 [Watanabe 2010] T. Watanabe, T.A. Bartrand, M.H. Weir, T. Omura, C.N. Haas. Development of a dose-response model for  
507 SARS coronavirus *Risk Anal.*, 30 (2010), pp. 1129-1138, 10.1111/j.1539-6924.2010.01427.x
- 508 [Mueller 2020] Amy V Mueller, Matthew J. Eden, Jessica J. Oakes, Chiara Bellini, Loretta A Fernandez  
509 Quantitative Method for Comparative Assessment of Particle Filtration Efficiency of Fabric Masks as Alternatives to Standard  
510 Surgical Masks for PPE edRxiv 2020.04.17.20069567; doi: <https://doi.org/10.1101/2020.04.17.20069567>
- 511  
512 [Li 2007] Li Y, Leung GM, Tang JW, Yang X, Chao CY, et al. (2007) Role of ventilation in airborne transmission of infectious agents  
513 in the built environment—A multidisciplinary systematic review. *Indoor Air* 17: 2–18.
- 514 [Marr 2012] Marr, David; Mason, Mark; Mosley, Ron; Liu, Xiaoyu. 2012 The influence of opening windows and doors on the  
515 natural ventilation rate of a residential building. *The Free Library* (January, 1), [https://www.thefreelibrary.com/The influence](https://www.thefreelibrary.com/The+influence+of+opening+windows+and+doors+on+the+natural+ventilation...-a0282940533)  
516 [of opening windows and doors on the natural ventilation...-a0282940533](https://www.thefreelibrary.com/The+influence+of+opening+windows+and+doors+on+the+natural+ventilation...-a0282940533)
